# Supplementary material for: A Proximity Complementation Assay to Identify Small Molecules That Enhance the Traffic of ABCA4 Misfolding Variants
Source: MDPI journal article supplement (doi:10.3390/ijms25084521), 2024-04-20
Supplement: s1 [file s1]

## Supplementary Material

### A proximity complementation assay to identify small molecules that enhance the traffic of ABCA4 misfolding variants.

Davide Piccolo, Christina Zarouchlioti, James Bellingham, Rosellina Guarascio, Kalliopi Ziaka, Robert S. Molday and Michael E. Cheetham

|            |                                                                                    |   |
|------------|------------------------------------------------------------------------------------|---|
| PNGase F   |                                                                                    | + |
| EndoH      |                                                                                    | + |
| T° control | +                                                                                  |   |
| ABCA4      | 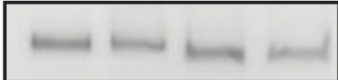 |   |

**Figure S1. Glycosylation status of ABCA4 in mouse retina.** 6 µg of protein lysate from mouse retina were treated with EndoH, PNGase-F, or buffer and temperature only protocol-control (T°). A slight increase in protein mobility was observed following both PNGase-F and EndoH. N= 2 mice retinas.

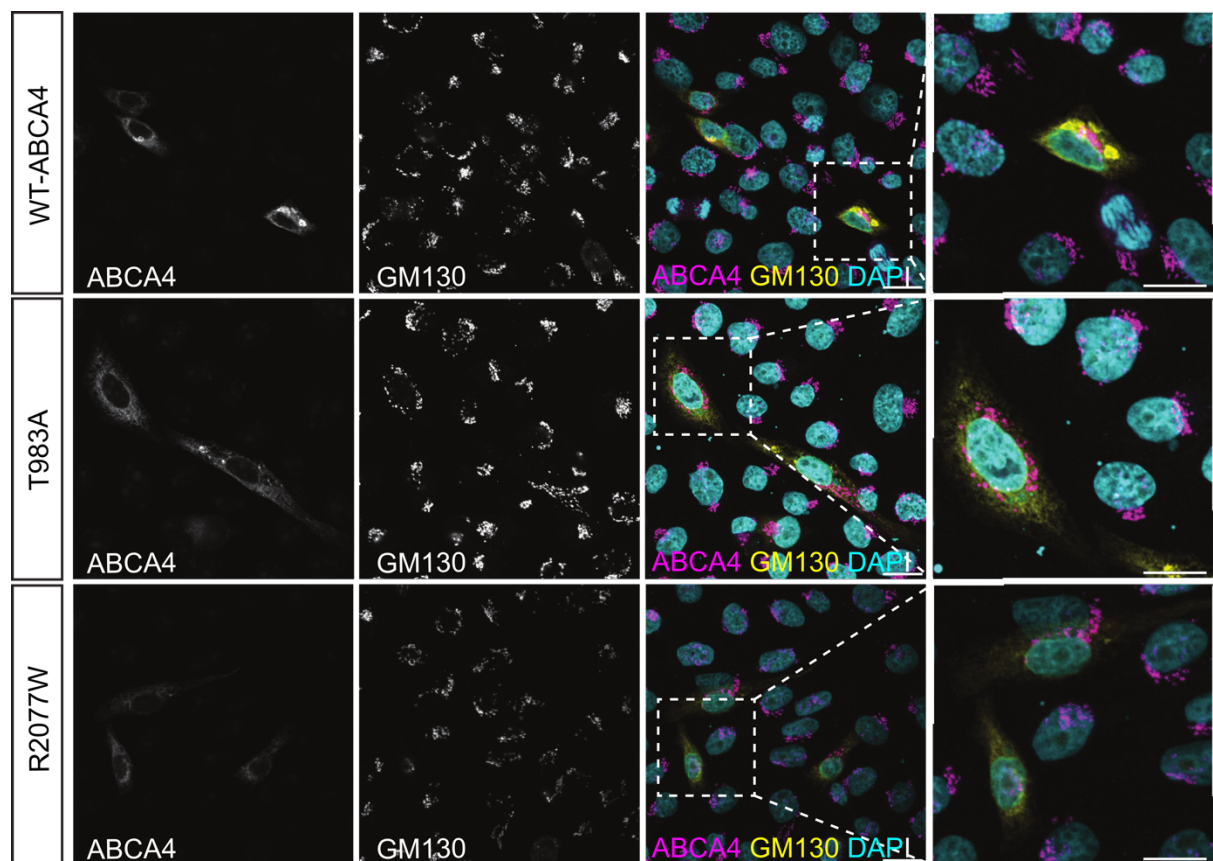

**Figure S2. ABCA4 and Golgi localization in cultured cells.** CHO cells were transfected with plasmid expressing WT ABCA4 protein and the indicated variants. 48 hours post-transfection cells were fixed in 4% PFA and permeabilised with Triton X-100 and double labelled with the ABCA4-Abbexa (yellow) and GM130 (magenta). ABCA4 was not detected overlapping with the Golgi. Scale bars = 10  $\mu$ m

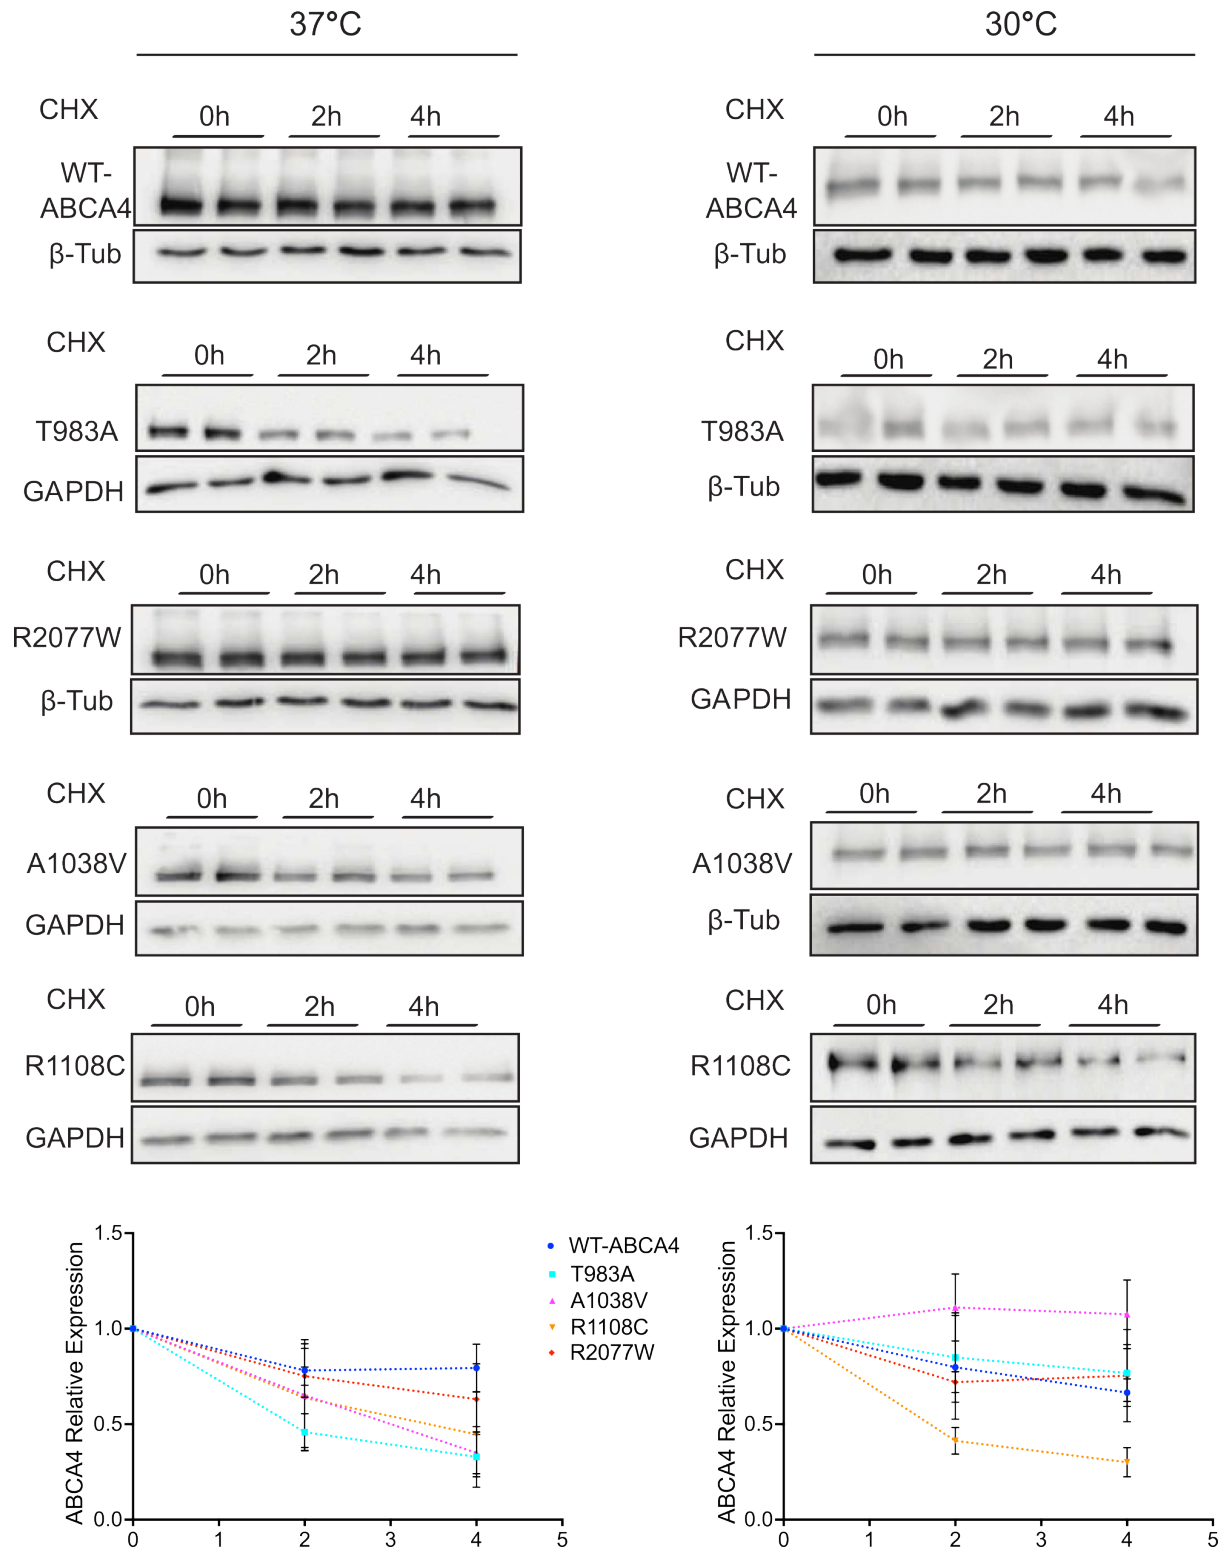

**Figure S3. The effect of the temperature on ABCA4 protein degradation.** HEK293T cells were transfected with plasmids expressing WT ABCA4 and variants and incubated at 37°C or 30°C. 48h post-transfection cells were treated with 50  $\mu$ M of (CHX) for 0, 2 and 4 h and western blotted (10  $\mu$ g of protein lysate). Graphs show quantification of protein levels by ImageJ. Data were normalised to GAPDH/ $\beta$ -Tubulin. Mean of fold change + SD. n = 3 independent experiments.

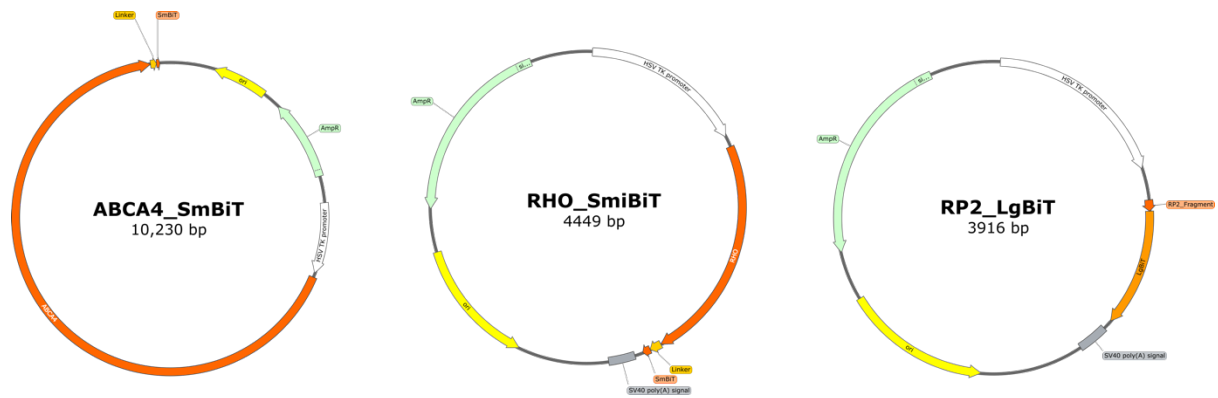

**Figure S4. Plasmid maps.** The RP2-LBiT, RHO-SmBiT and ABCA4-SmBiT plasmid maps. The P23H and the ABCA4 missense variants are not shown since they all are single nucleotide variants in the coding sequence and the vector backbones are the same.

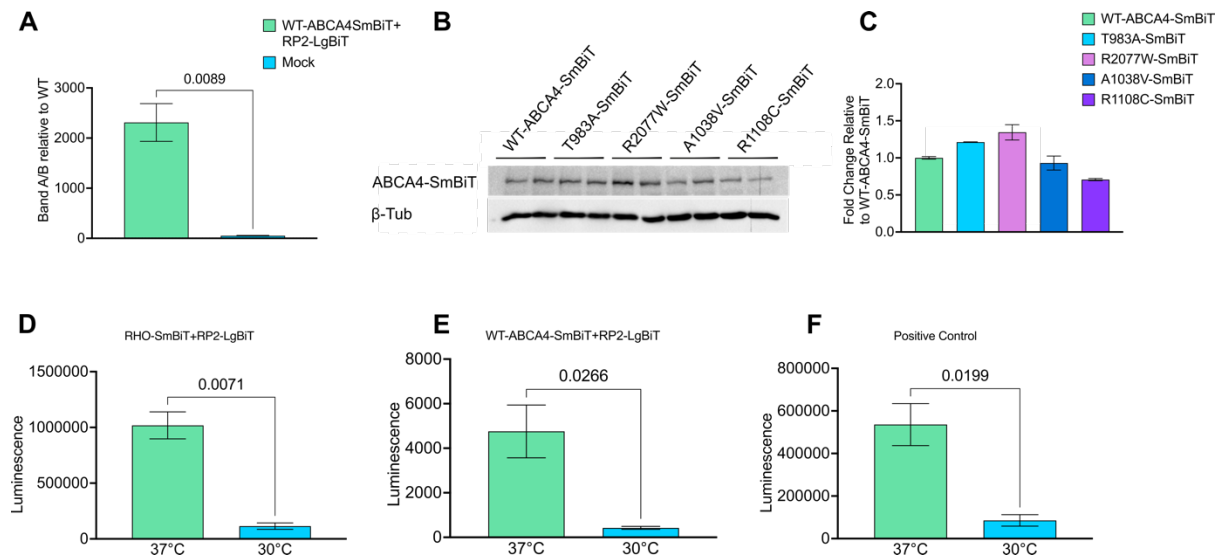

**Figure S5. Validation of split NanoBit complementation assay** **A)** 48h post-transfection live HEK293T cells were analysed using a luminometer. WT-ABCA4-SmBiT + RP2-SmBiT shows a stronger luminescence with compared to the non-transfected cells (Mock). Error bars are SD.  $n = 3$ . Two-tailed Student's t-test. **B,C)** 48h post-transfection HEK293T cells were collected, and the protein lysate was analysed by western blot and quantification was obtained with ImageJ. No marked decrease in the steady state level of the ABCA4 proteins was detected.  $n = 2$ . **D-F)** Luminescence produced at 37°C was compared to the signal produced at 30°C using the RHO-SmBiT+RP2-LgBiT and the ABCA4-SmBiT+RP2-LgBiT plasmids in HEK293T. A significant drop in luminescence signal was observed at 30°C in HEK293T cells in both conditions. **F)** Luminescence signal at 37°C vs 30 °C was also studied using the positive control plasmids provided in the NanoLuc Binary Technology system by Promega. A significant drop in luminescence signal was observed at 30°C. Error bars are SD. Two-tailed Student's t-test.

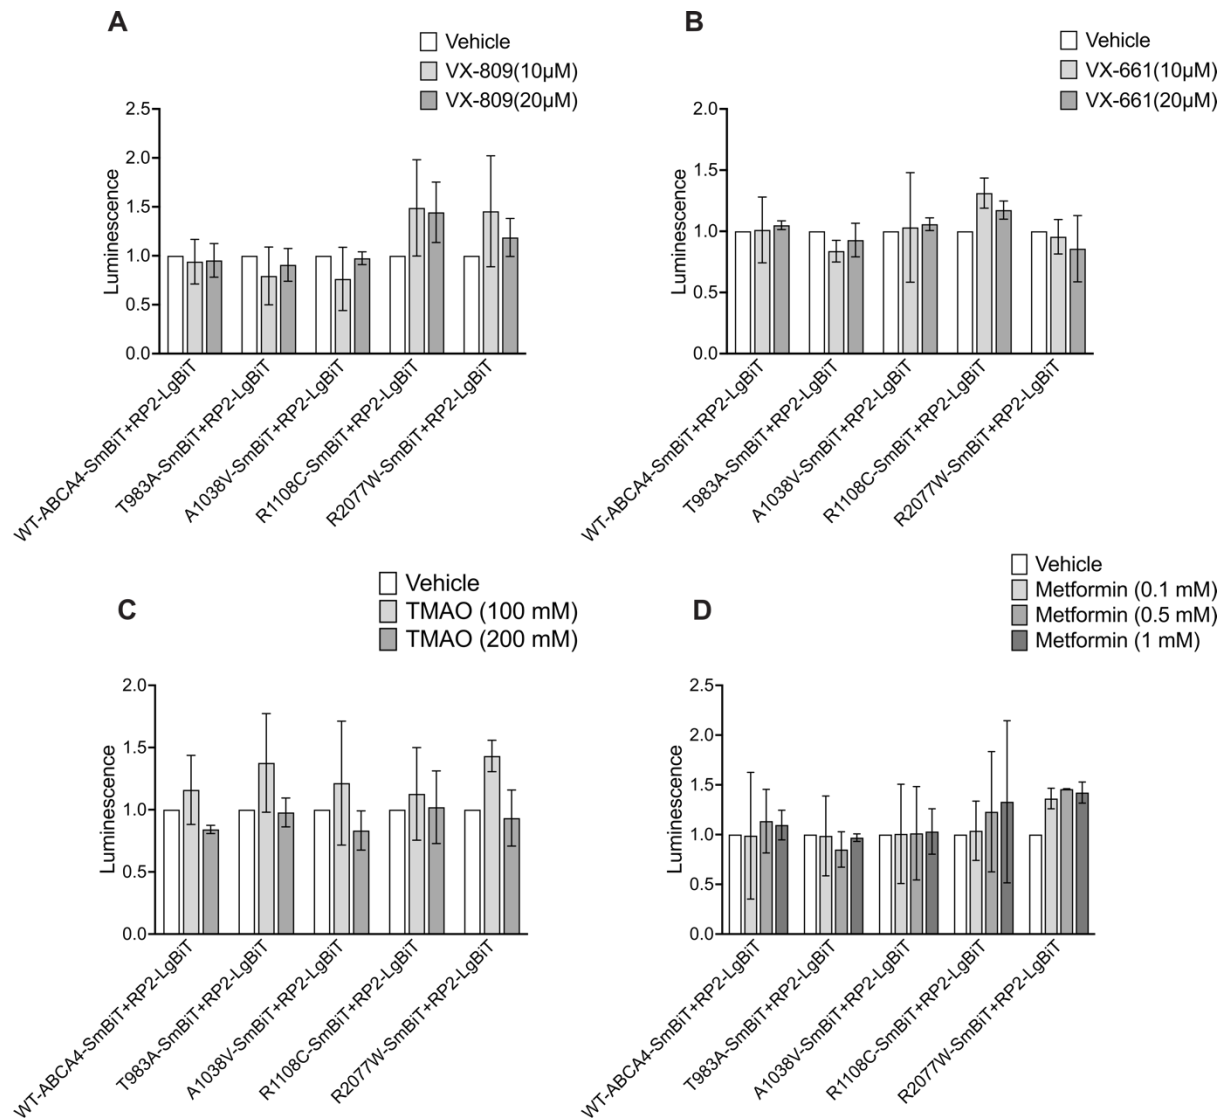

**Figure S6. Small compounds are screened using the complementation assay. A and B)** Luminescence signal in HEK293T was analysed after 48h from transient transfection for the indicated NanoBiT fusion combinations. 24h post transfection cells were treated with 10  $\mu$ M or 20  $\mu$ M of VX-809 (**A**) and VX-661 (**B**) for a total of 24h treatment. Mean fold change in luminescence relative to the vehicle + SD. n=2. **C)** 48h post transfection cells were treated with different concentrations of TMAO (100 and 200 mM) for a total of 24h treatment. Mean fold change in luminescence relative to the vehicle + SD. n=3. **D)** Luminescence signal in HEK293T was analysed after 48h from transient transfection for the indicated NanoBiT fusion combinations. 24h post transfection cells were treated with different concentration of metformin (0.1, 0.5 and 1 mM) for a total of 24h treatment. Mean fold change in luminescence relative to the vehicle + SD. n=2

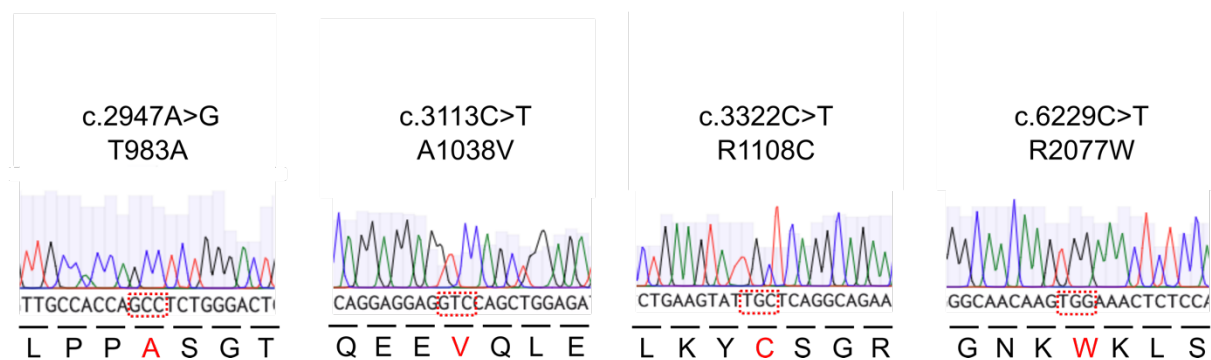

**Figure S7. ABCA4 variants sequences.** Sanger sequences of ABCA4-SmBiT plasmid variants to confirm the introduction of the specific point mutation in the correct position (red box).

### WT-ABCA4-SmBiT plasmid

TTGTGATGCTATTGCTTTATTTGTAACCATTATAAGCTGCAATAAACAAGTTAACAACAAC  
AATTGCATTCATTTTATGTTTCAGGTTTCAGGGGGAGGTGTGGGAGGTTTTTTAAAGCAA  
GTAAAACCTCTACAAATGTGGTAAATCGATAAGGATCCGTCGACCGATGCCCTTGAGA  
GCCTTCAACCCAGTCAGCTCCTTCCGGTGGGCGCGGGGCATGACTATCGTCGCCGCA  
CTTATGACTGTCTTCTTTATCATGCAACTCGTAGGACAGGTGCCGGCAGCGCTCTTCCG  
CTTCCTCGCTCACTGACTCGCTGCGCTCGGTCTGCTCGGCTGCGGCGAGCGGTATCAG  
CTCACTCAAAGGCGGTAATACGGTTATCCACAGAATCAGGGGATAACGCAGGAAAGAA  
CATGTGAGCAAAAGGCCAGCAAAAGGCCAGGAACCGTAAAAAGGCCGCGTTGCTGGC  
GTTTTTCCATAGGCTCCGCCCCCTGACGAGCATCACAAAAATCGACGCTCAAGTCAGA  
GGTGGCGAAACCCGACAGGACTATAAAGATACCAGGCGTTTCCCCCTGGAAGCTCCCT  
CGTGCGCTCTCCTGTTCCGACCCTGCCGCTTACCGGATACCTGTCCGCCTTTCTCCCTT  
CGGGAAGCGTGGCGCTTTCTCATAGCTCACGCTGTAGGTATCTCAGTTCGGTGTAGGT  
CGTTCGCTCCAAGCTGGGCTGTGTGCACGAACCCCCCGTTCAGCCCGACCGCTGCGC  
CTTATCCGGTAAGTATCGTCTTGAGTCCAACCCGGTAAGACACGACTTATCGCCACTGG  
CAGCAGCCACTGGTAACAGGATTAGCAGAGCGAGGTATGTAGGCGGTGCTACAGAGTT  
CTTGAAGTGGTGGCCTAACTACGGCTACACTAGAAGAACAGTATTTGGTATCTGCGCTC  
TGCTGAAGCCAGTTACCTTCGGAAAAAGAGTTGGTAGCTCTTGATCCGGCAAACAAACC  
ACCGCTGGTAGCGGTGGTTTTTTGTTTGCAAGCAGCAGATTACGCGCAGAAAAAAG  
GATCTCAAGAAGATCCTTTGATCTTTTCTACGGGGTCTGACGCTCAGTGGAACGAAAAC  
TCACGTTAAGGGATTTTGGTCATGAGATTATCAAAAAGGATCTTCACCTAGATCCTTTTA  
AATTA AAAATGAAGTTTTAAATCAATCTAAAGTATATATGAGTAACTTGGTCTGACAGC  
GGCCGCAAATGCTAAACCACTGCAGTGGTTACCAGTGCTTGATCAGTGAGGCACCGAT  
CTCAGCGATCTGCCTATTTGTTTCGTCCATAGTGGCCTGACTCCCCGTCGTGTAGATCA  
CTACGATTCGTGAGGGCTTACCATCAGGCCCCAGCGCAGCAATGATGCCGCGAGAGC  
CGCGTTACCCGGCCCCCGATTTGTCAGCAATGAACCAGCCAGCAGGGAGGGCCGAGC  
GAAGAAGTGGTCCTGCTACTTTGTCCGCCTCCATCCAGTCTATGAGCTGCTGTCTGAT  
GCTAGAGTAAGAAGTTCGCCAGTGAGTAGTTTCCGAAGAGTTGTGGCCATTGCTACTG  
GCATCGTGGTATCACGCTCGTCGTTCCGTATGGCTTCGTTCAACTCTGGTTCCAGCG  
GTCAAGCCGGGTACATGATCACCCATATTATGAAGAAATGCAGTCAGCTCCTTAGGGC  
CTCCGATCGTTGTCAGAAGTAAGTTGGCCGCGGTGTTGTCGCTCATGGTAATGGCAGC  
ACTACACAATTCTCTTACCGTCATGCCATCCGTAAGATGCTTTTCCGTGACCGGCGAGT  
ACTCAACCAAGTCGTTTTGTGAGTAGTGTATACGGCGACCAAGCTGCTCTTGCCCGGC  
GTCTATACGGGACAACACCGCGCCACATAGCAGTACTTTGAAAGTGCTCATCATCGGG  
AATCGTTCTTCGGGGCGGAAAGACTCAAGGATCTTGCCGCTATTGAGATCCAGTTCGAT  
ATAGCCCACTCTTGACCCAGTTGATCTTCAGCATCTTTTACTTTACCAGCGTTTTCGG  
GGTGTGCAAAAACAGGCAAGCAAAATGCCGCAAAGAAGGGAATGAGTGCGACACGAAA  
ATGTTGGATGCTCATACTCGTCCTTTTTCAATATTATTGAAGCATTATCAGGGTTACTA  
GTACGTCTCTCAAGGATAAGTAAGTAATATTAAGGTACGGGAGGTATTGGACAGGCCG  
CAATAAAATATCTTTATTTTCATTACATCTGTGTGTTGGTTTTTTGTGTGAATCGATAGTA  
CTAACATACGCTCTCCATCAAAACAAAACGAAACAAAACAACTAGCAAAATAGGCTGT  
CCCCAGTGCAAGTGCAGGTGCCAGAACATTTCTCTGGCCTAACTGGCCGGTACCTGAG  
TCTAAATGAGTCTTCGGACCTCGCGGGGGCCGCTTAAGCGGTGGTTAGGGTTTGTCTG  
ACGCGGGGGGAGGGGGGAAGGAACGAAACACTCTCATTTCGGAGGCGGCTCGGGGTTT  
GGTCTTGGTGGCCACGGGCACGCAGAAGAGCGCCGCGATCCTCTTAAGCACCCCCC  
GCCCTCCGTGGAGGCGGGGGTTTGGTCGGCGGGTGGTAACTGGCGGGCCGCTGACT  
CGGGCGGGTCGCGCGCCCCAGAGTGTGACCTTTTCGGTCTGCTCGCAGACCCCCGGG  
CGGCGCCGCCGCGGCGGCGACGGGCTCGCTGGGTCTAGGCTCCATGGGGACCGTA



TACGTGGACAGGCTCTGGAGCATCCGCACGACTGCGGTGATATTACCGGAGACCTTCT  
GCGGGACGAGCCGGGTACGCGGCTGACGCGGAGCGTCCGTTGGGCGACAAACACC  
AGGACGGGGCACAGGTACACTATCTTGTACCCGGAGGCGCGAGGGACTGCAGGAGC  
TTCAGGGAGTGGCGCAGCTGCTTCATCCCCGTGGCCCGTTGCTCGCGTTTGCTGGCG  
GTGTCCCCGGAAGAAATATATTTGCATGTCTTTAGTTCTATGATGACACAAACCCCGCC  
CAGCGTCTTGTCAATTGGCGAAGTCGAACACGCAGATGCAGTCGGGGCGGCGCGGTCC  
CAGGTCCACTTCGCATATTAAGGTGACGCGTGTGGCCTCGAACACCGAGCGACCCTGC  
AGCGACCCGCTTAAAAGCTTGGCAATCCGGTACTGTGGTAAAGCCACCAGATCTGGCC  
ACCATGGGCTTCGTGAGACAGATACAGCTTTTGCTCTGGAAGAACTGGACCCTGCGGA  
AAAGGCAAAAGATTGCTTTGTGGTGGAACCTGTGTGGCCTTTATCTTTATTCTGGTCT  
TGATCTGGTTAAGGAATGCCAACCCACTCTACAGCCATCATGAATGCCATTTCCCCAAC  
AAGGCGATGCCCTCAGCAGGAATGCTGCCGTGGCTCCAGGGGATCTTCTGCAATGTGA  
ACAATCCCTGTTTTCAAAGCCCCACCCAGGAGAATCTCCTGGAATTGTGTCAAACAT  
AACAACTCCATCTTGGCAAGGGTATATCGAGATTTTCAAGAACTCCTCATGAATGCACC  
AGAGAGCCAGCACCTTGGCCGTATTTGGACAGAGCTACACATCTTGTCCCAATTCATGG  
ACACCCTCCGGACTCACCCGGAGAGAATTGCAGGAAGAGGAATACGAATAAGGGATAT  
CTTGAAAGATGAAGAAACACTGACACTATTTCTCATTAAAAACATCGGCCTGTCTGACTC  
AGTGGTCTACCTTCTGATCAACTCTCAAGTCCGTCCAGAGCAGTTCGCTCATGGAGTCC  
CGGACCTGGCGCTGAAGGACATCGCCTGCAGCGAGGCCCTCCTGGAGCGCTTCATCA  
TCTTCAGCCAGAGACGCGGGGCAAAGACGGTGCCTATGCCCTGTGCTCCCTCTCCCA  
GGGCACCCTACAGTGGATAGAAGACACTCTGTATGCCAACGTGGACTTCTTCAAGCTCT  
TCCGTGTGCTTCCCACACTCCTAGACAGCCGTTCTCAAGGTATCAATCTGAGATCTTGG  
GGAGGAATATTATCTGATATGTCACCAAGAATTCAAGAGTTTATCCATCGGCCGAGTAT  
GCAGGACTTGCTGTGGGTGACCAGGCCCTCATGCAGAATGGTGGTCCAGAGACCTTT  
ACAAAGCTGATGGGCATCCTGTCTGACCTCCTGTGTGGCTACCCCGAGGGAGGTGGCT  
CTCGGGTGCTCTCCTTCAACTGGTATGAAGACAATAACTATAAGGCCTTTCTGGGGATT  
GACTCCACAAGGAAGGATCCTATCTATTCTTATGACAGAAGAACAACATCCTTTTGTAA  
GCATTGATCCAGAGCCTGGAGTCAAATCCTTTAACCAAAATCGCTTGGAGGGCGGCAA  
AGCCTTTGCTGATGGGAAAAATCCTGTACACTCCTGATTCACCTGCAGCACGAAGGATA  
CTGAAGAATGCCAACTCAACTTTTGAAGAAGTGAACACGTTAGGAAGTTGGTCAAAGC  
CTGGGAAGAAGTAGGGCCCCAGATCTGGTACTTCTTTGACAACAGCACACAGATGAAC  
ATGATCAGAGATACCCTGGGGAACCCAACAGTAAAGACTTTTTGAATAGGCAGCTTGG  
TGAAGAAGGTATTACTGCTGAAGCCATCCTAAACTTCTCTACAAGGGCCCTCGGGAAA  
GCCAGGCTGACGACATGGCCAACTTCGACTGGAGGGACATATTTAACATCACTGATCG  
CACCTCCGCTGGTCAATCAATACCTGGAGTGCTTGGTCTGGATAAGTTTGAAAGCT  
ACAATGATGAAACTCAGCTCACCCAACGTGCCCTCTCTCTACTGGAGGAAAACATGTT  
TGGGCCGGAGTGGTATTCCCTGACATGTATCCCTGGACCAGCTCTCTACCACCCACG  
TGAAGTATAAGATCCGAATGGACATAGACGTGGTGGAGAAAACCAATAAGATTAAAGAC  
AGGTATTGGGATTCTGGTCCCAGAGCTGATCCCGTGGAAGATTTCGGGTACATCTGGG  
GCGGGTTTGCTATCTGCAGGACATGGTTGAACAGGGGATCACAAGGAGCCAGGTGC  
AGGCGGAGGCTCCAGTTGGAATCTACCTCCAGCAGATGCCCTACCCCTGCTTCGTGGA  
CGATTCTTTCATGATCATCCTGAACCGCTGTTCCCTATCTTCATGGTGCTGGCATGGAT  
CTACTCTGTCTCCATGACTGTGAAGAGCATCGTCTTGGAGAAGGAGTTGCGACTGAAG  
GAGACCTTGAAAAATCAGGGTGTCTCCAATGCAGTGATTTGGTGTACCTGGTTCCTGGA  
CAGCTTCTCCATCATGTGATGAGCATCTTCTCCTGACGATATTCATCATGCATGGAA  
GAATCCTACATTACAGCGACCCATTCATCCTCTTCTGTTCTTGTGGCTTTCTCCACTG  
CCACCATCATGCTGTGCTTTCTGCTCAGCACCTTCTTCTCCAAGGCCAGTCTGGCAGCA  
GCCTGTAGTGGTGTCTATTTTACCCTCTACCTGCCACACATCCTGTGCTTCGCTG

GCAGGACCGCATGACCGCTGAGCTGAAGAAGGCTGTGAGCTTACTGTCTCCGGTGGC  
ATTTGGATTTGGCACTGAGTACCTGGTTCGCTTTGAAGAGCAAGGCCTGGGGCTGCAG  
TGGAGCAACATCGGGAACAGTCCCACGGAAGGGGACGAATTCAGCTTCCTGCTGTCCA  
TGCAGATGATGCTCCTTGATGCTGCTGTCTATGGCTTACTCGCTTGGTACCTTGATCAG  
GTGTTTCCAGGAGACTATGGAACCCCACTTCCTTGGTACTTTCTTCTACAAGAGTCGTA  
TTGGCTTGGCGGTGAAGGGTGTTCACCAGAGAAGAAAGAGCCCTGGAAAAGACCGA  
GCCCCTAACAGAGGAAACGGAGGATCCAGAGCACCCAGAAGGAATACAGACTCCTTC  
TTTGAACGTGAGCATCCAGGGTGGGTTCTGGGGTATGCGTGAAGAATCTGGTAAAGA  
TTTTTGAGCCCTGTGGCCGGCCAGCTGTGGACCGTCTGAACATCACCTTCTACGAGAA  
CCAGATCACCGCATTCTGGGCCACAATGGAGCTGGGAAAACCACCACCTTGTCCATC  
CTGACGGGTCTGTTGCCACCAACCTCTGGGACTGTGCTCGTTGGGGGAAGGGACATTG  
AAACCAGCCTGGATGCAGTCCGGCAGAGCCTTGGCATGTGTCCACAGCACAACATCCT  
GTTCCACCACCTCACGGTGGCTGAGCACATGCTGTTCTATGCCAGCTGAAAGGAAAG  
TCCCAGGAGGAGGCCAGCTGGAGATGGAAGCCATGTTGGAGGACACAGGCCTCCAC  
CACAAGCGGAATGAAGAGGCTCAGGACCTATCAGGTGGCATGCAGAGAAAGCTGTCTG  
GTTGCCATTGCCTTTGTGGGAGATGCCAAGGTGGTGATTCTGGACGAACCCACCTCTG  
GGGTGGACCCTTACTCGAGACGCTCAATCTGGGATCTGCTCCTGAAGTATCGCTCAGG  
CAGAACCATCATCATGTCCACTCACCATATGGACGAGGCCGACCTCCTTGGGGACCGC  
ATTGCCATCATTGCCCAGGGAAGGCTCTACTGCTCAGGCACCCCACTCTTCCTGAAGA  
ACTGCTTTGGCACAGGCTTGTACTTAACCTTGGTGCGCAAGATGAAAAACATCCAGAGC  
CAAAGGAAAGGCAGTGAGGGGACCTGCAGCTGCTCGTCTAAGGGTTTCTCCACCACGT  
GTCCAGCCCACGTCGATGACCTAACTCCAGAACAAGTCCTGGATGGGGATGTAAATGA  
GCTGATGGATGTAGTTCTCCACCATGTTCCAGAGGCCAAAGCTGGTGGAGTGCATTGGT  
CAAGAACTTATCTTCCTTCTTCCAAATAAGAACTTCAAGCACAGAGCATATGCCAGCCTT  
TTCAGAGAGCTGGAGGAGACGCTGGCTGACCTTGGTCTCAGCAGTTTTTGAATTTCTG  
ACACTCCCCTGGAAGAGATTTTTCTGAAGGTCACGGAGGATTCTGATTCAGGACCTCTG  
TTTGCGGGTGGCGCTCAGCAGAAAAGAGAAAACGTCAACCCCCGACACCCCTGCTTGG  
GTCCCAGAGAGAAGGCTGGACAGACACCCAGGACTCCAATGTCTGCTCCCCAGGGG  
CGCCGGCTGCTCACCCAGAGGGCCAGCCTCCCCCAGAGCCAGAGTGCCAGGCCCG  
CAGCTCAACACGGGGACACAGCTGGTCCTCCAGCATGTGCAGGCGCTGCTGGTCAAG  
AGATTCCAACACACCATCCGCAGCCACAAGGACTTCCTGGCGCAGATCGTGCTCCCGG  
CTACCTTTGTGTTTTTGGCTCTGATGCTTTCTATTGTTATCCCTCCTTTTGGCGAATACC  
CCGCTTTGACCCTTCACCCCTGGATATATGGGCAGCAGTACACCTTCTTCAGCATGGAT  
GAACCAGGCAGTGAGCAGTTCACGGTACTTGACAGACGTCCTCCTGAATAAGCCAGGCT  
TTGGCAACCGCTGCCTGAAGGAAGGGTGGCTTCCGGAGTACCCCTGTGGCAACTCAAC  
ACCCTGGAAGACTCCTTCTGTGTCCCCAAACATCACCCAGCTGTTCCAGAAGCAGAAAT  
GGACACAGGTCAACCCTTCACCATCCTGCAGGTGCAGCACCAGGGAGAAGCTCACCAT  
GCTGCCAGAGTGCCCCGAGGGTGCCGGGGGCCTCCCGCCCCCCCAGAGAACACAGC  
GCAGCACGGAAATTCTACAAGACCTGACGGACAGGAACATCTCCGACTTCTTGGTAAAA  
ACGTATCCTGCTCTTATAAGAAGCAGCTTAAAGAGCAAATTCTGGGTCAATGAACAGAG  
GTATGGAGGAATTTCCATTGGAGGAAAGCTCCCAGTCGTCCCCATCACGGGGGAAGCA  
CTTGTTGGGTTTTTAAGCGACCTTGCCGGATCATGAATGTGAGCGGGGGGCCCTATCA  
CTAGAGAGGCCTCTAAAGAAATACCTGATTTCTTAAACATCTAGAACTGAAGACAACA  
TTAAGGTGTGGTTTAATAACAAAGGCTGGCATGCCCTGGTCAGCTTTCTCAATGTGGCC  
CACAACGCCATCTTACGGGCCAGCCTGCCTAAGGACAGGAGCCCCGAGGAGTATGGA  
ATCACCGTCATTAGCCAACCCCTGAACCTGACCAAGGAGCAGCTCTCAGAGATTACAGT  
GCTGACCACTTCAGTGGATGCTGTGGTTGCCATCTGCGTGATTTTCTCCATGTCCTTCG  
TCCCAGCCAGCTTTGTCTTTATTTGATCCAGGAGCGGGTGAACAAATCCAAGCACCTC

CAGTTTATCAGTGGAGTGAGCCCCACCACCTACTGGGTGACCAACTTCCTCTGGGACA  
TCATGAATTATTCCGTGAGTGCTGGGCTGGTGGTGGGCATCTTCATCGGGTTTCAGAA  
GAAAGCCTACACTTCTCCAGAAAACCTTCTGCCCTTGTGGCACTGCTCCTGCTGTATG  
GATGGGCGGTCATTCCCATGATGTACCCAGCATCCTTCTGTTTGATGTCCCCAGCACA  
GCCTATGTGGCTTTATCTTGTGCTAATCTGTTTCATCGGCATCAACAGCAGTGCTATTACC  
TTCATCTTGGAATTATTTGAGAATAACCGGACGCTGCTCAGGTTCAACGCCGTGCTGAG  
GAAGCTGCTCATTGTCTTCCCCCACTTCTGCCTGGGCCGGGGCCTCATTGACCTTGCA  
CTGAGCCAGGCTGTGACAGATGTCTATGCCCGGTTTGGTGAGGAGCACTCTGCAAATC  
CGTTCCACTGGGACCTGATTGGGAAGAACCTGTTTGCCATGGTGGTGGAAAGGGGTGGT  
GTACTTCCTCCTGACCCTGCTGGTCCAGCGCCACTTCTTCCTCTCCCAATGGATTGCCG  
AGCCCACTAAGGAGCCCATTGTTGATGAAGATGATGATGTGGCTGAAGAAAGACAAAG  
AATTATTACTGGTGAAATAAAACTGACATCTTAAGGCTACATGAACTAACCAAGATTTA  
TCCAGGCACCTCCAGCCCAGCAGTGGACAGGCTGTGTGTGCGGAGTTCGCCCTGGAGA  
GTGCTTTGGCCTCCTGGGAGTGAATGGTGCCGGCAAACAACCACATTCAAGATGCTC  
ACTGGGGACACCACAGTGACCTCAGGGGATGCCACCGTAGCAGGCAAGAGTATTTTAA  
CCAATATTTCTGAAGTCCATCAAAATATGGGCTACTGTCCTCAGTTTGATGCAATTGATG  
AGCTGCTCACAGGACGAGAACATCTTTACCTTTATGCCCGGCTTCGAGGTGTACCAGC  
AGAAGAAATCGAAAAGGTTGCAAACCTGGAGTATTAAGAGCCTGGGCCTGACTGTCTAC  
GCCGACTGCCTGGCTGGCACGTACAGTGGGGGCAACAAGCGGAAACTCTCCACAGCC  
ATCGCACTCATTGGCTGCCACCGCTGGTGTGCTGGATGAGCCCACCACAGGGATG  
GACCCCCAGGCACGCCGCATGCTGTGGAACGTCATCGTGAGCATCATCAGAGAAGGG  
AGGGCTGTGGTCCTCACATCCCACAGCATGGAAGAATGTGAGGCACTGTGTACCCGGC  
TGGCCATCATGGTAAAGGGCGCCTTTCGATGTATGGGCACCATTCAGCATCTCAAGTC  
CAAATTTGGAGATGGCTATATCGTCACAATGAAGATCAAATCCCCGAAGGACGACCTGC  
TTCCTGACCTGAACCTGTGGAGCAGTTCTTCCAGGGGAACTTCCCAGGCAGTGTGCA  
GAGGGAGAGGCACTACAACATGCTCCAGTTCAGGTCTCCTCCTCCTCCCTGGCGAGG  
ATCTTCCAGCTCCTCCTCTCCACAAAGGACAGCCTGCTCATCGAGGAGTACTCAGTCAC  
ACAGACCACACTGGACCAGGTGTTTGTAATTTTGCTAAACAGCAGACTGAAAGTCATG  
ACCTCCCTCTGCACCCTCGAGCTGCTGGAGCCAGTCGACAAGCCCAGGACGCAGCTC  
AGGGGAATTCTGGCTCGAGCGGTGGTGGCGGGAGCGGAGGTGGAGGGTCGTCAGGT  
GTGACCGGCTACCGGCTGTTTCGAGGAGATTCTGTAACTCTAGAGTCGGGGCGGGCCGGC  
CGCTTCGAGCAGACATGATAAGATACATTGATGAGTTTGGACAAACCACAACCTAGAATG  
CAGTGAAAAAATGCTTTATTTGTGAAAT

## RP2-LgBiT plasmid

GGCCTAACTGGCCGGTACCTGAGTCTAAATGAGTCTTCGGACCTCGCGGGGGCCGCTT  
AAGCGGTGGTTAGGGTTTGTCTGACGCGGGGGAGGGGGAAGGAACGAAACACTCTC  
ATTCGGAGGCGGCTCGGGGTTTGGTCTTGGTGGCCACGGGCACGCAGAAGAGCGCCG  
CGATCCTCTTAAGCACCCCCCGCCCTCCGTGGAGGCGGGGGTTTGGTCGGCGGGTG  
GTAAGTGGCGGGCCGCTGACTCGGGCGGGTCGCGCGCCCCAGAGTGTGACCTTTTCG  
GTCTGCTCGCAGACCCCCGGGCGGGCGCCGCCGCGGCGGCGACGGGCTCGCTGGGTG  
CTAGGCTCCATGGGGACCGTATACGTGGACAGGCTCTGGAGCATCCGCACGACTGCG  
GTGATATTACCGGAGACCTTCTGCGGGACGAGCCGGGTACGCGGGCTGACGCGGAGC  
GTCCGTTGGGCGACAAACACCAGGACGGGGCACAGGTAACTATCTTGTACCCGGA  
GGCGCGAGGGACTGCAGGAGCTTCAGGGAGTGGCGCAGCTGCTTCATCCCGTGCGC  
CGTTGCTCGCGTTTGTGTCGGGTGTCCCCGAAGAAATATATTTGCATGTCTTTAGTTC  
TATGATGACACAAACCCCCGCCAGCGTCTTGTGATTGGCGAAGTCGAACACGCAGATG  
CAGTCGGGGCGGGCGCGGTCCCAGGTCCACTTCGCATATTAAGGTGACGCGTGTGGCC

TCGAACACCGAGCGACCCTGCAGCGACCCGCTTAAAAGCTTGGCAATCCGGTACTGTT  
GGTAAAGCCACCAGATCTGCTAGCGATCGCCTAAGTGGGAGCTCAGGGGAATTCTGGC  
TCGAGCGGTGGTGGCGGGAGCGGAGGTGGAGGGTCGTCAGGTGCCACC**ATGGGCTG**  
**CTTCTTCTCCAAGAGACGGAAGGCTGACAAGGAGTCG****GTCTTCACACTCGAAGATTTC**  
**GTTGGGGACTGGGAACAGACAGCCGCCTACAACCTGGACCAAGTCCTTGAACAGGGA**  
**GGTGTGTCCAGTTTGCTGCAGAATCTCGCCGTGTCCGTAACCTCCGATCCAAAGGATTGT**  
**CCGGAGCGGTGAAAATGCCCTGAAGATCGACATCCATGTCATCATCCCGTATGAAGGT**  
**CTGAGCGCCGACCAAATGGCCCAGATCGAAGAGGTGTTTAAGGTGGTGTACCCTGTGG**  
**ATGATCATCACTTTAAGGTGATCCTGCCCTATGGCACACTGGTAATCGACGGGGTTACG**  
**CCGAACATGCTGAACTATTTCCGACGGCCGTATGAAGGCATCGCCGTGTTTCGACGGCA**  
**AAAAGATCACTGTAACAGGGACCCTGTGGAACGGCAACAAAATTATCGACGAGCGCCT**  
**GATCACCCCCGACGGCTCCATGCTGTTCCGAGTAACCATCAACAGCTAA**TCTAGAGTC  
GGGGCGGCCGCGCCTTCGAGCAGACATGATAAGATACATTGATGAGTTTGGACAAAC  
CACAAC TAGAATGCAGTGAAAAAATGCTTTATTTGTGAAATTTGTGATGCTATTGCTTT  
ATTTGTAACCATTATAAGCTGCAATAAACAAGTTAACAACAACAATTGCATTCATTTTATG  
TTTCAGGTTTCAGGGGGAGGTGTGGGAGGTTTTTTAAAGCAAGTAAACCTCTACAAATG  
TGGTAAAATCGATAAGGATCCGTCGACCGATGCCCTTGAGAGCCTTCAACCCAGTCAG  
CTCCTTCCGGTGGGCGCGGGGCATGACTATCGTCGCCGCACTTATGACTGTCTTCTTT  
ATCATGCAACTCGTAGGACAGGTGCCGGCAGCGCTCTTCCGCTTCTCGCTCACTGAC  
TCGCTGCGCTCGGTCGTTCCGGCTGCGGCGAGCGGTATCAGCTCACTCAAAGGCGGTA  
ATACGGTTATCCACAGAATCAGGGGATAACGCAGGAAAGAACATGTGAGCAAAAGGCC  
AGCAAAAGGCCAGGAACCGTAAAAAGGCCGCGTTGCTGGCGTTTTTCCATAGGCTCCG  
CCCCCTGACGAGCATCACAAAAATCGACGCTCAAGTCAGAGGTGGCGAAACCCGACA  
GGACTATAAAGATACCAGGCGTTTCCCCCTGGAAGCTCCCTCGTGCGCTCTCCTGTTT  
CGACCCTGCCGCTTACCGGATACCTGTCCGCCTTTCTCCCTTCGGGAAGCGTGGCGCT  
TTCTCATAGCTCACGCTGTAGGTATCTCAGTTCGGTGTAGGTCGTTGCTCCAAAGCTGG  
GCTGTGTGCACGAACCCCCCGTTACGCCGACCGCTGCGCCTTATCCGGTAACTATCG  
TCTTGAGTCCAACCCGGTAAGACACGACTTATCGCCACTGGCAGCAGCCACTGGTAAC  
AGGATTAGCAGAGCGAGGTATGTAGGCGGTGCTACAGAGTTCTTGAAGTGGTGGCCTA  
ACTACGGCTACACTAGAAGAACAGTATTTGGTATCTGCGCTCTGCTGAAGCCAGTTACC  
TTCGGAAAAAGAGTTGGTAGCTCTTGATCCGGCAAACAAACCACCGCTGGTAGCGGTG  
GTTTTTTTGTGTTGCAAGCAGCAGATTACGCGCAGAAAAAAGGATCTCAAGAAGATCCT  
TTGATCTTTTCTACGGGGTCTGACGCTCAGTGGAACGAAAACCTCACGTAAAGGGATTTT  
GGTCATGAGATTATCAAAAAGGATCTTCACCTAGATCCTTTTAAATTA AAAAATGAAGTTTT  
AAATCAATCTAAAGTATATATGAGTAACTTGGTCTGACAGCGGCCGCAAATGCTAAAC  
CACTGCAGTGGTTACCAGTGCTTGATCAGTGAGGCACCGATCTCAGCGATCTGCCTATT  
TCGTTGTCATAGTGGCCTGACTCCCCGTGCTGTAGATCACTACGATTGCTGAGGGC  
TTACCATCAGGCCCCAGCGCAGCAATGATGCCGCGAGAGCCGCGTTACCGGGCCCCC  
GATTTGTCAGCAATGAACCAGCCAGCAGGGAGGGCCGAGCGAAGAAGTGGTCCTGCT  
ACTTTGTCCGCCTCCATCCAGTCTATGAGCTGCTGTGCTGATGCTAGAGTAAGAAGTTC  
GCCAGTGAGTAGTTTCCGAAGAGTTGTGGCCATTGCTACTGGCATCGTGGTATCACGC  
TCGTGCTTCGGTATGGCTTCGTTCAACTCTGGTTCCAGCGGTCAAGCCGGGTACAT  
GATCACCCATATTATGAAGAAATGCAGTCAGCTCCTTAGGGCCTCCGATCGTTGTCAGA  
AGTAAGTTGGCCGCGGTGTTGTGCTCATGGTAATGGCAGCACTACACAATTCTCTTAC  
CGTCATGCCATCCGTAAGATGCTTTTCCGTGACCGGCGAGTACTCAACCAAGTCGTTTT  
GTGAGTAGTGTATACGGCGACCAAGCTGCTCTTGCCCGGCGTCTATACGGGACAACAC  
CGCGCCACATAGCAGTACTTTGAAAGTGCTCATCATCGGGAATCGTTCTTCGGGGCGG  
AAAGACTCAAGGATCTTGCCGCTATTGAGATCCAGTTCGATATAGCCCACTCTTGACC

CAGTTGATCTTCAGCATCTTTTACTTTTCACCAGCGTTTCGGGGTGTGCAAAAACAGGCA  
AGCAAAATGCCGCAAAGAAGGGAATGAGTGCGACACGAAAATGTTGGATGCTCATACT  
CGTCCTTTTTCAATATTATTGAAGCATTTATCAGGGTTACTAGTACGTCTCTCAAGGATA  
AGTAAGTAATATTAAGGTACGGGAGGTATTGGACAGGCCGCAATAAAATATCTTTATTTT  
CATTACATCTGTGTGTTGGTTTTTTGTGTGAATCGATAGTACTAACATACGCTCTCCATC  
AAAACAAAACGAAACAAAACAAACTAGCAAAATAGGCTGTCCCCAGTGCAAGTGCAGGT  
GCCAGAACATTTCTCT

**Figure S8. WT-ABCA4-SmBiT and RP2-LgBiT plasmids sequences.** WT-ABCA4-SmBiT plasmid sequence is shown with WT-ABCA4 in yellow, linker in cyan and SmBiT in magenta. RP2-LgBiT plasmid sequence is displayed with RP2 in red and LgBiT in green.
